# Supplementary material
Source: MDPI journal article supplement (https://www.mdpi.com/2076-3417/11/12/5413)
Supplement: s1 [file s1 › applsci-1146111-supplementary.pdf]

Table S1

**Table S1.** Correlation plots between the SCA cupping score and the GC–MS normalized area of VIP-11 (left) and VIP-26 (right).

| No. | Country, Region               | Farm elevation (meters) | Cultivars        | Process | Remarks           | SCA cupping score (points) |
|-----|-------------------------------|-------------------------|------------------|---------|-------------------|----------------------------|
| 1   | The Guathemala                | >1350                   | –                | washed  |                   | 77.50                      |
| 2   | The Guathemala                | >1350                   | –                | washed  |                   | 76.50                      |
| 3   | The Guathemala                | –                       | –                | washed  |                   | 82.25                      |
| 4   | The Guathemala                | –                       | –                | washed  |                   | 81.00                      |
| 5   | The Guathemala                | >1350                   | –                | washed  |                   | 78.50                      |
| 6   | The Guathemala                | 900–1050                | –                | –       |                   | 79.00                      |
| 7   | The Guathemala                | >1350                   | –                | washed  |                   | 83.25                      |
| 8   | The Guathemala, Huehuetenango | 1500–2000               | pacamara         | washed  |                   | 89.00                      |
| 9   | The Guathemala, New Oriente   | 1400–1600               | pacamara         | –       |                   | 84.00                      |
| 10  | The Guathemala, Huehuetenango | 1100–1600               | –                | –       | JAS/FLO certified | 80.75                      |
| 11  | The Guathemala, New Oriente   | –                       | pacamara         | –       |                   | 81.50                      |
| 12  | The Guathemala, Antigua       | 1500–1700               | bourbon, catuai  | washed  | peaberry          | 82.25                      |
| 13  | The Guathemala, Antigua       | –                       | –                | –       |                   | 81.25                      |
| 14  | The Guathemala, Huehuetenango | 1500–2000               | bourbon, caturra | –       |                   | 82.00                      |
| 15  | The Guathemala                | –                       | –                | –       |                   | 81.25                      |
| 16  | The Guathemala, Antigua       | 1400–1500               | –                | washed  |                   | 82.00                      |

Figure S1

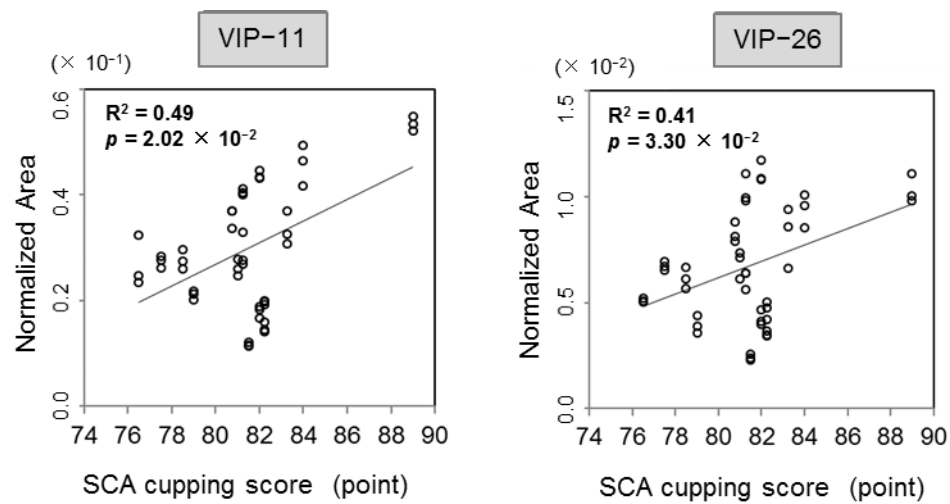

**Figure S1.** Correlation plots between the SCA cupping score and the GC-MS normalized area of VIP-11 (left) and VIP-26 (right).
